# Supplementary material
Source: Springer Nature journal article supplement (https://www.springermedizin.de/resource/supplementary/12885_2008_1374_MOESM4_ESM.pdf/9472790)

**The PAD4 levels in blood samples**

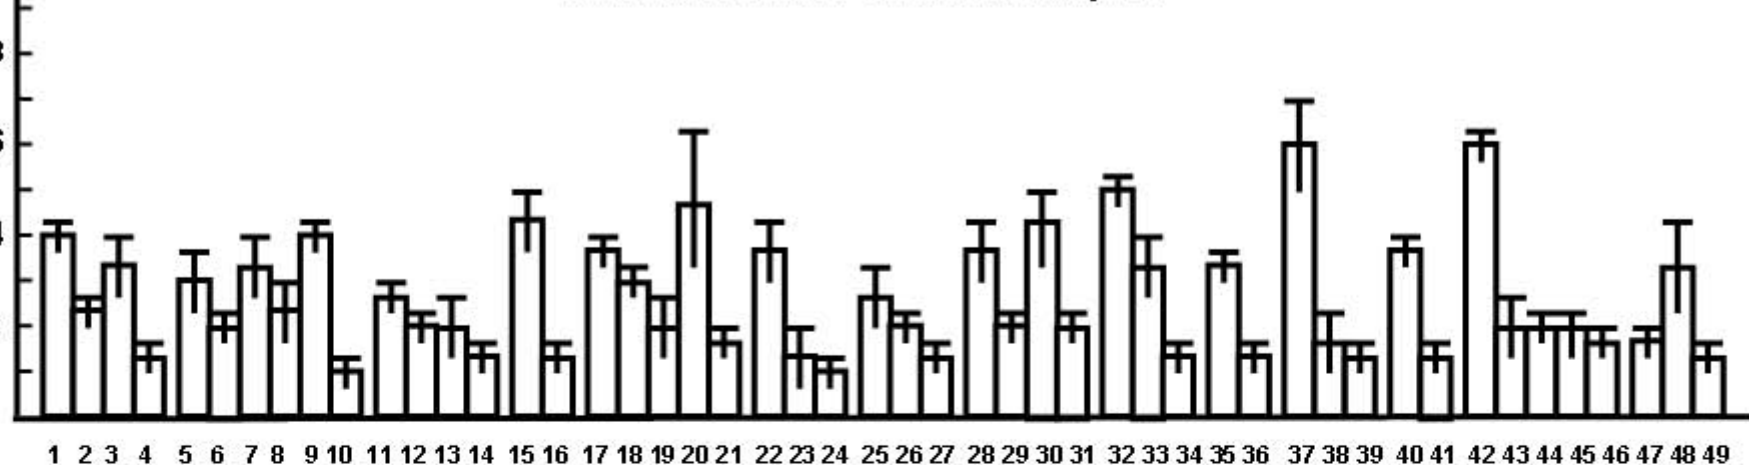

**The cAT levels in blood samples**

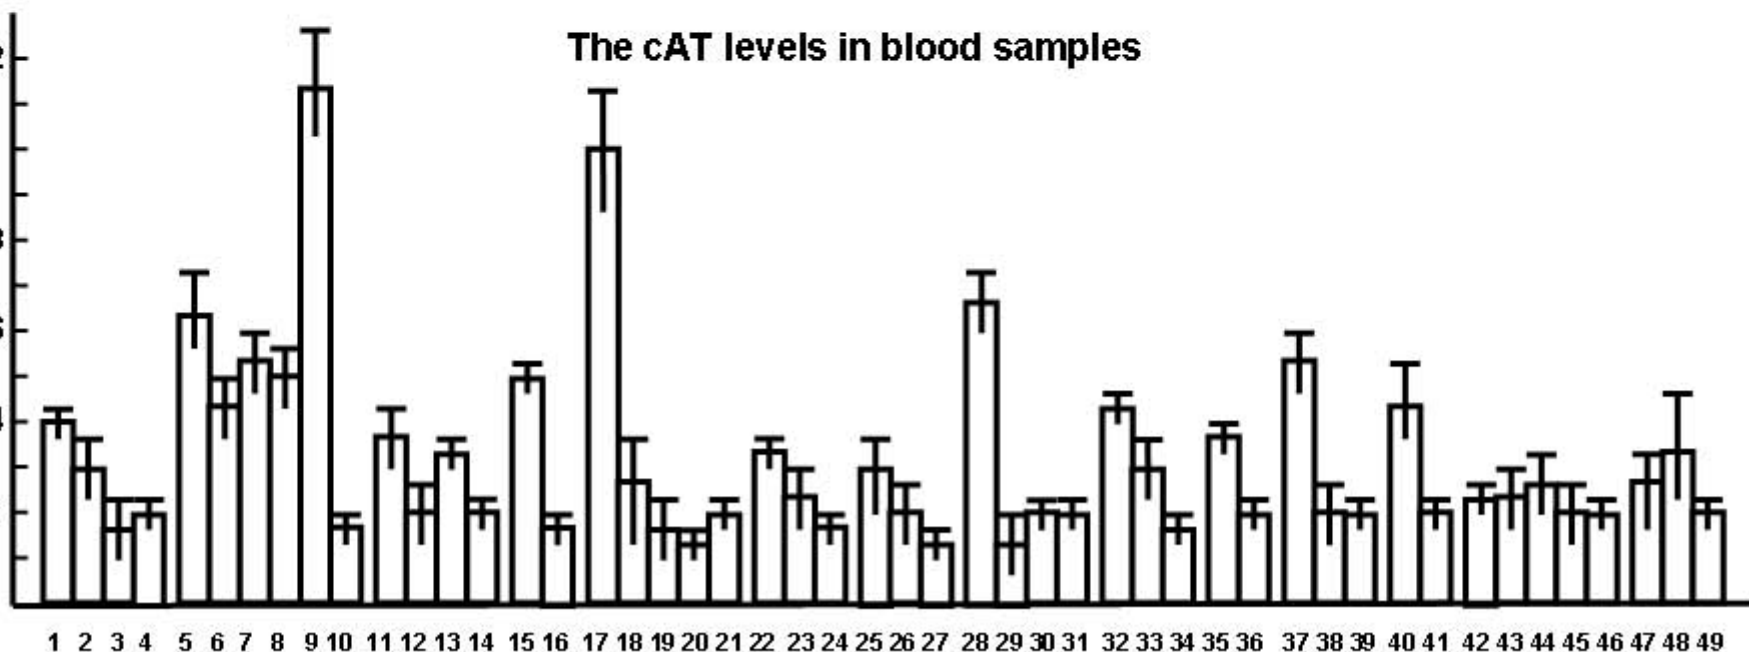

Supplement: MOESM4 [file 9472790]
